# Supplementary material for: Silicon Mitigates Salinity Stress by Regulating the Physiology, Antioxidant Enzyme Activities, and Protein Expression inCapsicum annuum‘Bugwang’
Source: Hindawi journal article supplement (doi:10.1155/2016/3076357), 2016-01-01
Supplement: f1 [file 3076357.f1.pdf]

Supplementary figures:

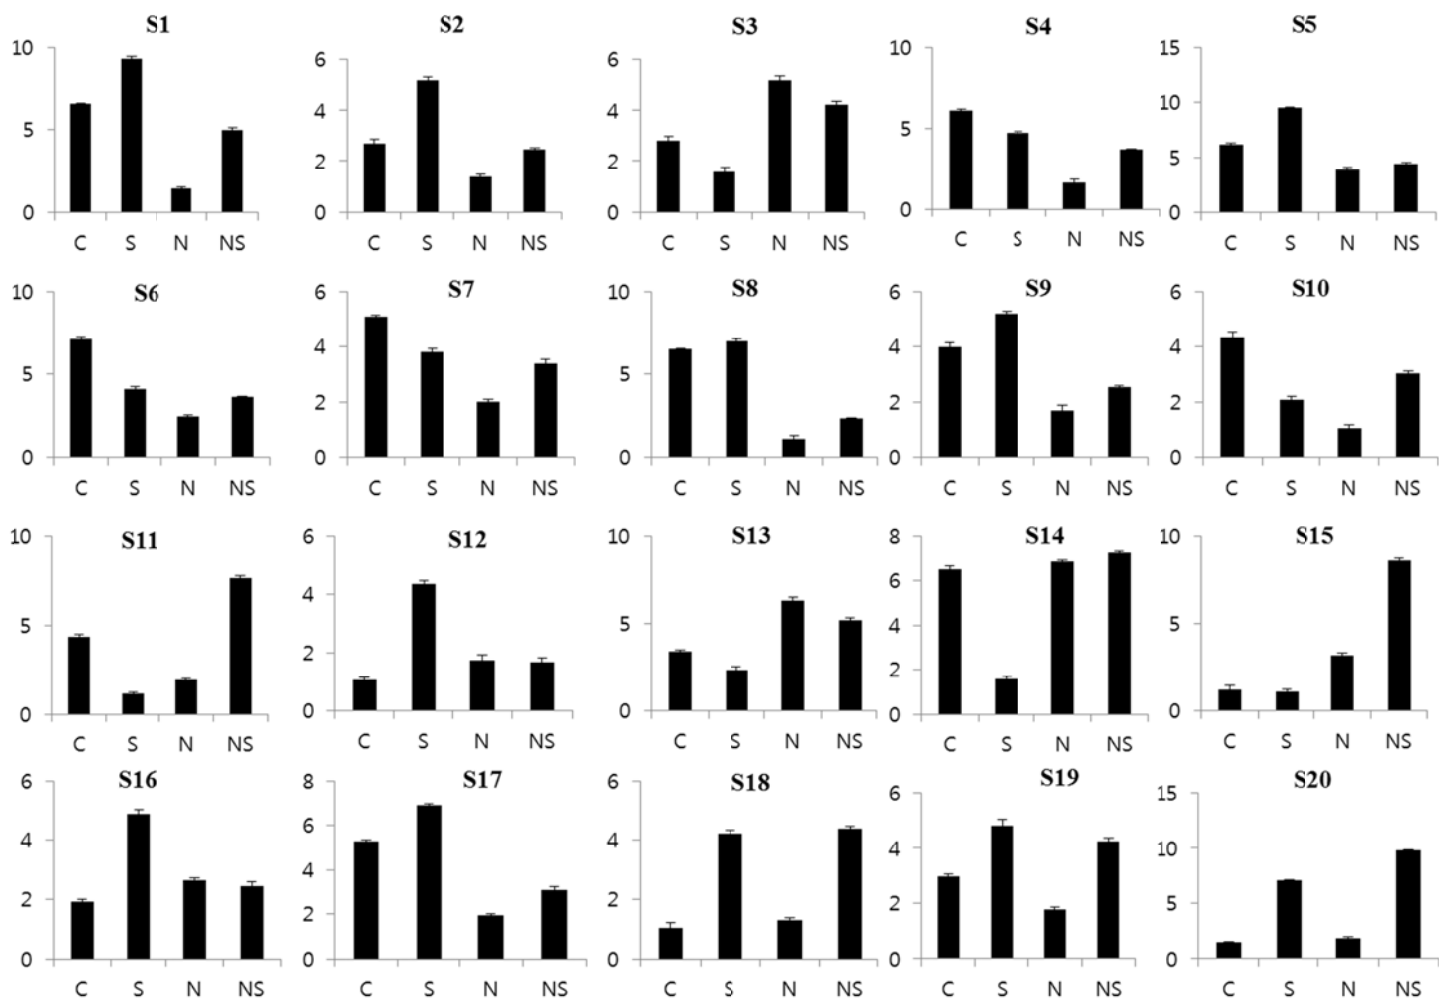

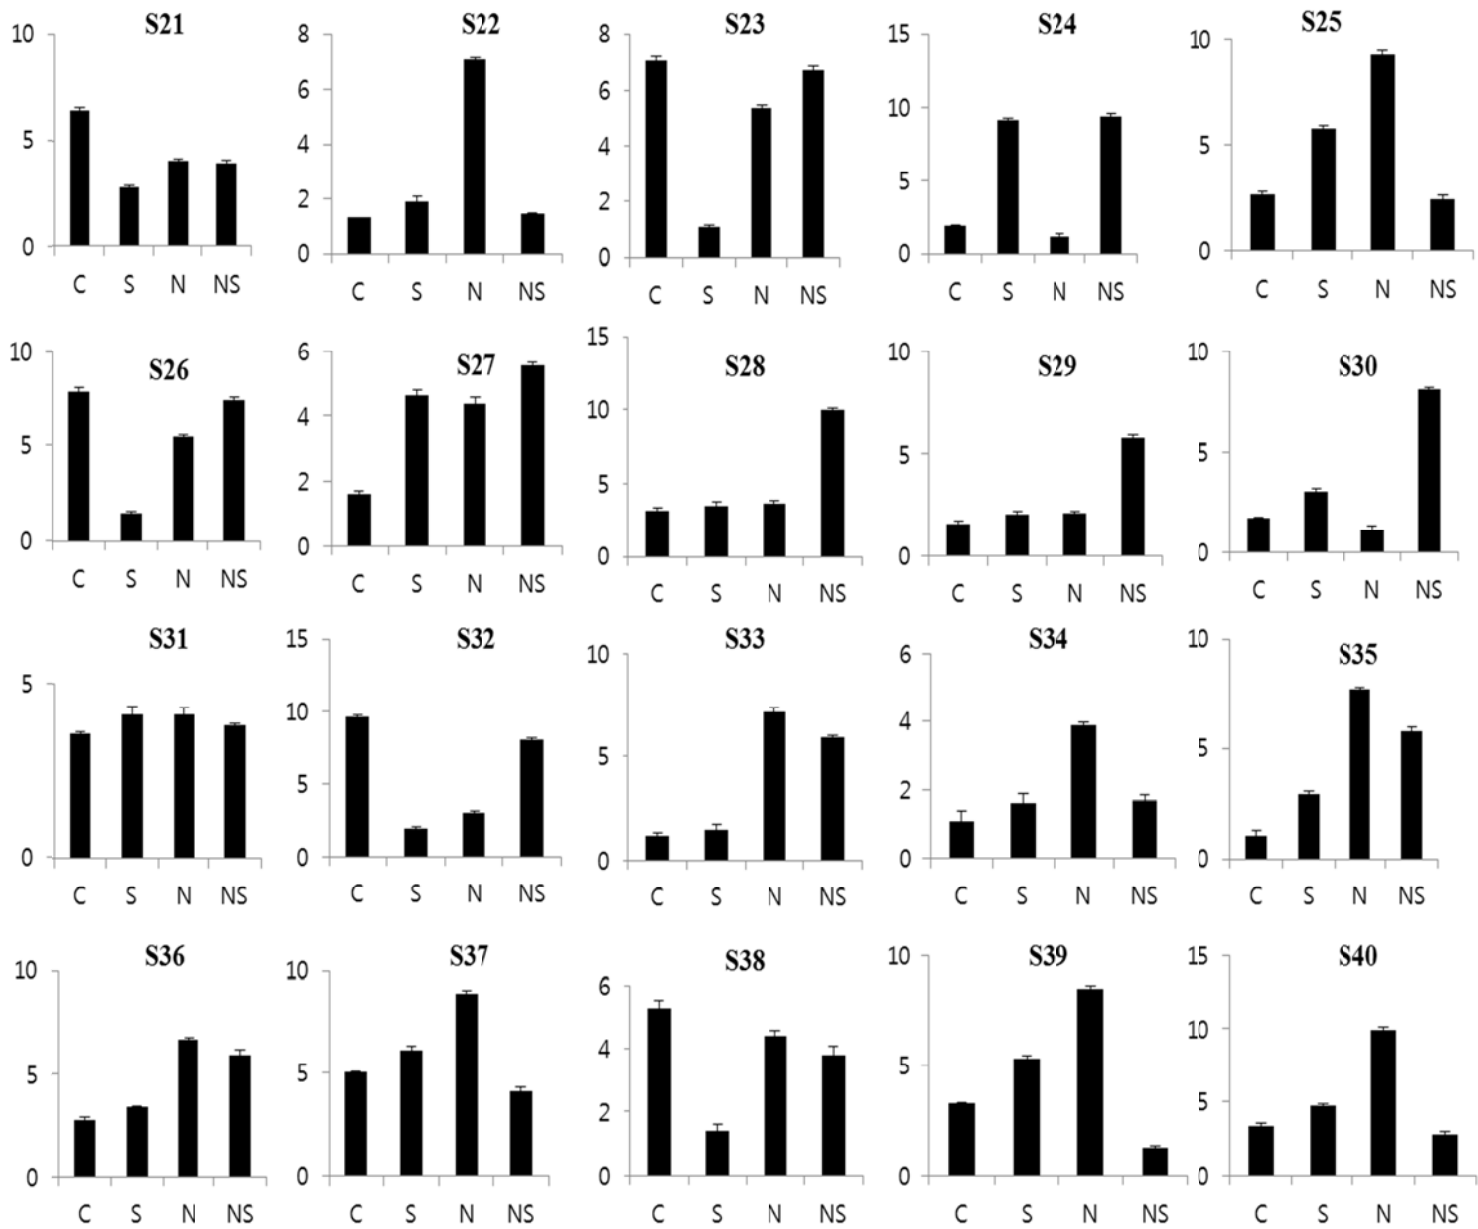

**Figure S1.** Graphical representation of spot volume mean of proteins. Spot volume mean, presented for 40 differentially regulated proteins upon Si application and salt stress (C-Control; S- Si; NS- Si + NaCl; N- NaCl).

**A**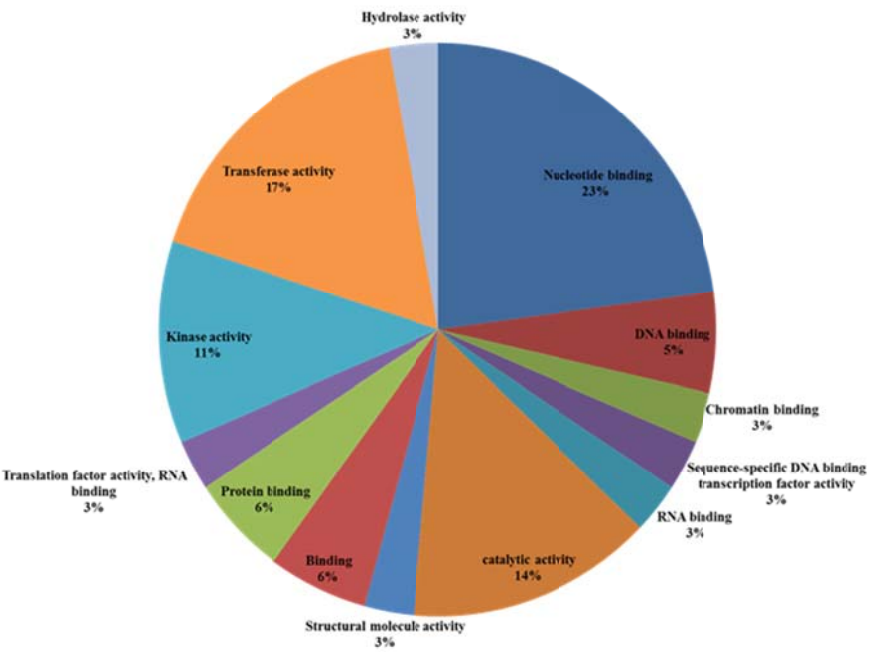**B**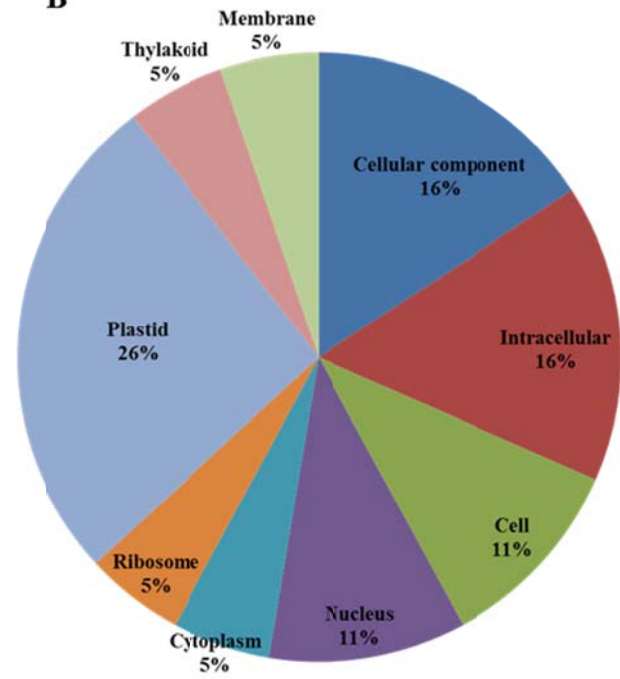

**Figure S2.** Gene ontology results of *C. annuum* proteins. (A) Putative functions. (B) Cellular component.
